# Supplementary material
Source: PubMed Central journal article supplement (PMC9380861)
Supplement: ehp10287.smcontents.508.pdf [file ehp10287.smcontents.508.pdf]

**Note to readers with disabilities:** *EHP* strives to ensure that all journal content is accessible to all readers. However, some figures and Supplemental Material published in *EHP* articles may not conform to [508 standards](#) due to the complexity of the information being presented. If you need assistance accessing journal content, please contact [ehp508@niehs.nih.gov](mailto:ehp508@niehs.nih.gov). Our staff will work with you to assess and meet your accessibility needs within 3 working days.

### **Supplemental Material**

#### **Integrated Forecasts Based on Public Health Surveillance and Meteorological Data Predict West Nile Virus in a High-Risk Region of North America**

Michael C. Wimberly, Justin K. Davis, Michael B. Hildreth, and Joshua L. Clayton

#### **Table of Contents**

**Figure S1.** Accuracy of lagged weekly West Nile virus predictions from zero to six weeks into the future from 2016-2019 measured as the area under the receiver operating characteristic curve (AUC).

**Figure S2.** Accuracy of South Dakota West Nile virus predictions from 2016-2019 in counties with no mosquito infection data measured as the area under the receiver operating characteristic curve (AUC).

**Additional File-** ArboMAP\_Main\_Code.Rmd
